# Supplementary material for: Identification and Functional Divergence Analysis of WOX Gene Family in Paper Mulberry
Source: MDPI journal article supplement (doi:10.3390/ijms18081782), 2017-08-16
Supplement: s1 [file s1]

# Supplementary Materials: Identification and Functional Divergence Analysis of WOX Gene Family in Paper Mulberry

Feng Tang, Naizhi Chen, Meiling Zhao, Yucheng Wang, Ruiping He, Xianjun Peng and Shihua Shen

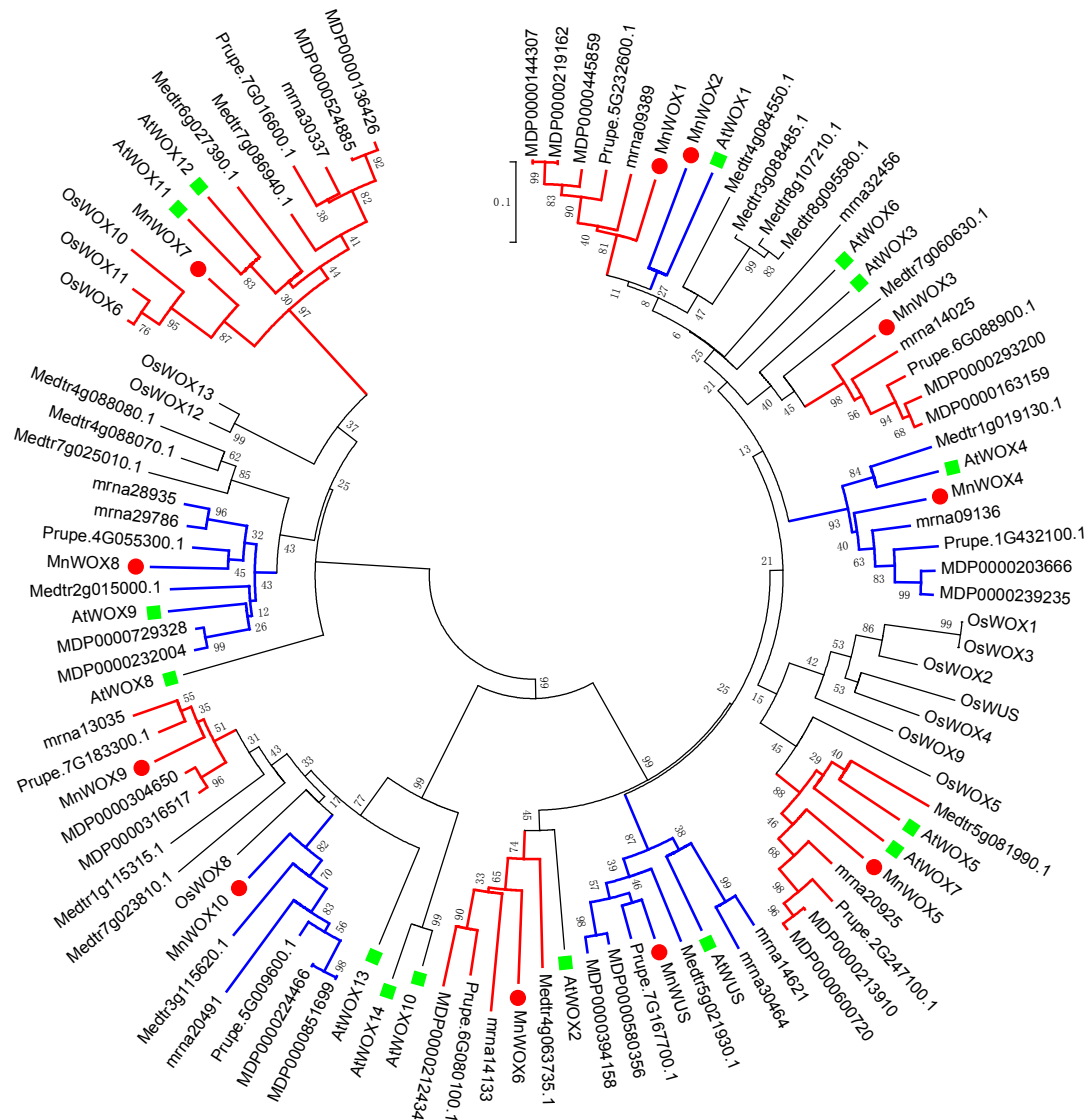

**Figure S1.** Phylogenetic analysis of BpWOX genes in *Morus notabilis*, *Fragaria vesca*, *Prunus persica*, *Malus domestica*, *Medicago truncatula*, *Arabidopsis thaliana* and *Oryza sativa*. There were eleven WOX genes in mulberry. Thus, we inferred that there might be eleven WOX genes in paper mulberry. Each of subclade WOX gene from seven species were aligned to find the conserved region and design the degenerate primers. The selected sequences for alignment were labeled with red or blue line. The MnWOX proteins were labeled by red dots, and the AtWOX proteins were labeled by green square. *M. notabilis*, Mn; *F. vesca*, mrna; *P. persica*, Prupe; *M. domestica*, MDP; *M. truncatula*, Medtr; *A. thaliana*, At; *O. sativa*, Os.

**Figure S2.** The sequences of *WUS* subclade were aligned to find the conserved regions and design the degenerate primers. The red line was the location of degenerate primers for *BpWUS*.

**Figure S3.** The sequences of *WOX1* subclade were aligned to find the conserved regions and design the degenerate primers. The red line was the location of degenerate primers for *BpWOX1*.

[illegible]

**Figure S4.** The sequences of *WOX2* subclade were aligned to find the conserved regions and design the degenerate primers. The red line was the location of degenerate primers for *BpWOX2*.



[illegible]









**Figure S9.** The sequences of *WOX8* subclade were aligned to find the conserved regions and design the degenerate primers. The red line was the location of degenerate primers for *BpWOX8*.



|                   |                                                                                                                           |      |   |
|-------------------|---------------------------------------------------------------------------------------------------------------------------|------|---|
| Medtr3g115620.1   |                                                                                                                           |      | 0 |
| MDP0000224466     | ATGGGGGAGTGGCGGCAGCAGCAGCAAAATAATCAACAGAAATTCAGAAACCCAGAAGAAGATGATGGGGTTGGAAATGGAAATGGAGGGTTGTTCTGTAAGGTTATGACCGACGAG     | 120  |   |
| MDP0000851699     |                                                                                                                           | 0    |   |
| mrna20491         |                                                                                                                           | 0    |   |
| Prupe. 5G009600.1 |                                                                                                                           | 0    |   |
| MniWOX10          |                                                                                                                           | 0    |   |
| Medtr3g115620.1   |                                                                                                                           | 0    |   |
| MDP0000224466     | CAAAATGGAGCAGCTGAGGCAACAGATCGCCGCTCTACACCAACCATTTTGACCAAGCTTTGAGCTTGCACAAAGCAACTCTCTGCCAACAGGATCTTACTTGTCGGTCTGCCCTCTCTCT | 240  |   |
| MDP0000851699     |                                                                                                                           | 0    |   |
| mrna20491         |                                                                                                                           | 0    |   |
| Prupe. 5G009600.1 |                                                                                                                           | 0    |   |
| MniWOX10          |                                                                                                                           | 0    |   |
| Medtr3g115620.1   |                                                                                                                           | 0    |   |
| MDP0000224466     | CTCTTCCAATCTGAATGGGCTTTTGTAATGAATTTATTCACCTTGCAAAATATTGATTTCATGGGTGGGAGCATGAANACCCGTTCTCAAGTTGGAGAAGCTTACCTCAGCTTGGTGG    | 360  |   |
| MDP0000851699     |                                                                                                                           | 0    |   |
| mrna20491         |                                                                                                                           | 0    |   |
| Prupe. 5G009600.1 |                                                                                                                           | 18   |   |
| MniWOX10          | ATGGTTATGGAGTGAAGAGTGAACAACATCAACATCAACAACAACAGATCTCATCATCAT                                                              | 63   |   |
| Medtr3g115620.1   |                                                                                                                           | 75   |   |
| MDP0000224466     | ATATATCTCCTCTCAACTCTTTCCAGGAGTTCAGGTGCAGGACCTTGNCAAATTCAGCCCCGGT...GCCCAACCTTAACCTCGRAATAAAGCAGATAGCGANACACAAA            | 477  |   |
| MDP0000851699     |                                                                                                                           | 0    |   |
| mrna20491         | ATGGAGGGGCGAGAGAAGAGTGTGCAGTGAATTTGACGGCTGAGGACTCAGAACAGATGGGTTTGCTCATGACGGACCAAGTC                                       | 93   |   |
| Prupe. 5G009600.1 | CAGCAGAGCAGAGATTCAGATCAGAATCAACAGCAATAATCCACCATTTGCAGAACCCAGAGATGCGTTTGGAAATGGAATGAGGGTTGTCCTGAAGTGTATCCGACAGCAAAATG      | 138  |   |
| MniWOX10          | CATCTATAGAATATCAGAGACTGCAGAAAGAGGAGAGAGAAATGATTGTTAATGGGTTTCTCCAAAGAGAGATTAGGGTTAATGTCCTGAGAGTGTATGCTGACGACAAATG          | 183  |   |
| Medtr3g115620.1   | GAACTTTTAAACAACAATATCTGCTACACCAACATTTCTGACCAACTTGTGAGATGCATTAATCAATTAACATCAACATGACCTCGCTGGACGAGCTTCGAAATTCGACTGT          | 195  |   |
| MDP0000224466     | ATGTGGATTAGTAATTTAAGTTTCTTTGTGGAAGAAGATTTTATTATTGGTGTGGCCTTCATTTCCTATTAATCATCAGTCTTCTGTTTCAGGATGAGACTCGCGAATTTTGTGTGT     | 597  |   |
| MDP0000851699     |                                                                                                                           | 24   |   |
| mrna20491         | GAGCAATCTCCAGAAACAGATCGCGCTCTACGCGCTCATCTGTGAGCAGCTTGTGATATGCACAAGGCTTCACTGCCCAACAGGATCTTCTGGATGAGAGTGGAAATCTGAGGC        | 213  |   |
| Prupe. 5G009600.1 | GAGCTGCTGAGGGCAGAGATCGCTGCTCTACGCCACCATTTTGTGAGCAGCTTGTGAGATGCACAAGGCGCTCACTGCTCAACAGGATCTTACTGGATGAGACTGAGGAAATTTGTGT    | 258  |   |
| MniWOX10          | GAGCTTCTGAGGGCAGATCTCTGCTACGCCACCATCTGCGACAGCTTGTGAGATGTTCAACTCTGCTCACTGCCCAACAGGATCTTCTGAGCTGAGACTGAGGAAATCTGAGTAT       | 303  |   |
| Medtr3g115620.1   | GATCGACTGAGATGCTTCTCTCTGAGACAGATTAAGCTCAGGCGACTGCGACCTTATCTGCTTAATCTGCTTAATCTGAGCTGCTTCTGCTGAGAGCTATGCTGCTGAGCT           | 315  |   |
| MDP0000224466     | GATCGATTTAGCCTATCTG...TGSCACAGATTAAGCTCAGGCGAGCTGCGACCTTATCTGCTTAATCTGCTTAATCTGAGCTGCTTCTGCTGAGAGCTATGCTGCTGAGCT          | 714  |   |
| MDP0000851699     | GATCGATTTAGCCTATCTG...TGSCACAGATTAAGCTCAGGCGAGCTGCGACCTTATCTGCTTAATCTGCTTAATCTGAGCTGCTTCTGCTGAGAGCTATGCTGCTGAGCT          | 141  |   |
| mrna20491         | GAT...TTGATGCTATTTG...TGSCACAGATTAAGCTCAGGCGAGCTGCGACCTTATCTGCTTAATCTGCTTAATCTGAGCTGCTTCTGCTGAGAGCTATGCTGCTGAGCT          | 327  |   |
| Prupe. 5G009600.1 | GATCGATTTAGCCTATCTG...TGSCACAGATTAAGCTCAGGCGAGCTGCGACCTTATCTGCTTAATCTGCTTAATCTGAGCTGCTTCTGCTGAGAGCTATGCTGCTGAGCT          | 375  |   |
| MniWOX10          | GATCGATTTAGCCTATCTG...TGSCACAGATTAAGCTCAGGCGAGCTGCGACCTTATCTGCTTAATCTGCTTAATCTGAGCTGCTTCTGCTGAGAGCTATGCTGCTGAGCT          | 420  |   |
| Medtr3g115620.1   | AAGCAGAGATCAAAAGATTAACCATTAAGCTAGGCGACTGCGACCTTATCTGCTTAATCTGCTTAATCTGAGCTGCTTCTGCTGAGAGCTATGCTGCTGAGCT                   | 435  |   |
| MDP0000224466     | AAGCAGAGATCAAAAGATTAACCATTAAGCTAGGCGACTGCGACCTTATCTGCTTAATCTGCTTAATCTGAGCTGCTTCTGCTGAGAGCTATGCTGCTGAGCT                   | 831  |   |
| MDP0000851699     | AAGCAGAGATCAAAAGATTAACCATTAAGCTAGGCGACTGCGACCTTATCTGCTTAATCTGCTTAATCTGAGCTGCTTCTGCTGAGAGCTATGCTGCTGAGCT                   | 258  |   |
| mrna20491         | AAGCAGAGATCAAAAGATTAACCATTAAGCTAGGCGACTGCGACCTTATCTGCTTAATCTGCTTAATCTGAGCTGCTTCTGCTGAGAGCTATGCTGCTGAGCT                   | 444  |   |
| Prupe. 5G009600.1 | AAGCAGAGATCAAAAGATTAACCATTAAGCTAGGCGACTGCGACCTTATCTGCTTAATCTGCTTAATCTGAGCTGCTTCTGCTGAGAGCTATGCTGCTGAGCT                   | 492  |   |
| MniWOX10          | AAGCAGAGATCAAAAGATTAACCATTAAGCTAGGCGACTGCGACCTTATCTGCTTAATCTGCTTAATCTGAGCTGCTTCTGCTGAGAGCTATGCTGCTGAGCT                   | 537  |   |
| Medtr3g115620.1   | CTCTGGGATTCATGCGATCTCAGGCGAGGCAAGAGT...GAGCTCTGAGAGAGGAGCAAGCTGTGAGAGAGGCTTCTGAGCTTCTGAGCTTCTGAGCT                        | 552  |   |
| MDP0000224466     | CTCTGGGATTCATGCGATCTCAGGCGAGGCAAGAGT...GAGCTCTGAGAGAGGAGCAAGCTGTGAGAGAGGCTTCTGAGCTTCTGAGCTTCTGAGCT                        | 939  |   |
| MDP0000851699     | CTCTGGGATTCATGCGATCTCAGGCGAGGCAAGAGT...GAGCTCTGAGAGAGGAGCAAGCTGTGAGAGAGGCTTCTGAGCTTCTGAGCTTCTGAGCT                        | 366  |   |
| mrna20491         | CTCTGGGATTCATGCGATCTCAGGCGAGGCAAGAGT...GAGCTCTGAGAGAGGAGCAAGCTGTGAGAGAGGCTTCTGAGCTTCTGAGCTTCTGAGCT                        | 549  |   |
| Prupe. 5G009600.1 | CTCTGGGATTCATGCGATCTCAGGCGAGGCAAGAGT...GAGCTCTGAGAGAGGAGCAAGCTGTGAGAGAGGCTTCTGAGCTTCTGAGCTTCTGAGCT                        | 600  |   |
| MniWOX10          | CTCTGGGATTCATGCGATCTCAGGCGAGGCAAGAGT...GAGCTCTGAGAGAGGAGCAAGCTGTGAGAGAGGCTTCTGAGCTTCTGAGCTTCTGAGCT                        | 648  |   |
| Medtr3g115620.1   | GTCAAGGATTCGACCTTCAGAGTCTTGACATAGGATTTGAGCACTTGTGGGAAATTTGAAGTTGCAGGCTGCTATATCTTACTTCTTTGA                                | 648  |   |
| MDP0000224466     | GCTCAAGATTCGACCTTCAGAGTCTTGACATAGGATTTGAGCACTTGTGGGAAATTTGAAGTTGCAGGCTGCTATATCTTACTTCTTTGA                                | 1058 |   |
| MDP0000851699     | GCTCAAGATTCGACCTTCAGAGTCTTGACATAGGATTTGAGCACTTGTGGGAAATTTGAAGTTGCAGGCTGCTATATCTTACTTCTTTGA                                | 423  |   |
| mrna20491         | ATTCAAAATTCGCTTGGCTTG                                                                                                     | 570  |   |
| Prupe. 5G009600.1 | GCGCAATATTCGACCTTCAGAGTCTTGACATAGGATTTGAGCACTTGTGGGAAATTTGAAGTTGCAGGCTGCTATATCTTACTTCTTTGA                                | 657  |   |
| MniWOX10          | GAGCTTAATTCGAGTTTCAGAGTCTTGAG...ATAATCAATG...ATTGTTGGCACTTTTCACCCTTCAGGAAGCTCTTGGCTCCGCTCACCCACCCTGGTGTGCTAGTTGCCTTTAGG   | 765  |   |
| Medtr3g115620.1   |                                                                                                                           |      |   |
| MDP0000224466     | AAAAAGTGGTGTGAATGATTTACAAAAACAGTTTCATGACCGAGTCTTGA                                                                        | 1107 |   |
| MDP0000851699     |                                                                                                                           |      |   |
| mrna20491         |                                                                                                                           |      |   |
| Prupe. 5G009600.1 |                                                                                                                           |      |   |
| MniWOX10          | GTGTGAGTGGTCCCGAGTTGATGAATTTGTCGGCTAGTGGAAAGTGCATTGAGCTACAAGCTTCGCTTCCTGGGAGGATGGATGTGGATGAGCTGTA                         | 866  |   |

**Figure S11.** The sequences of *WOX10* subclade were aligned to find the conserved regions and design the degenerate primers. The red line was the location of degenerate primers for *BpWOX10*.

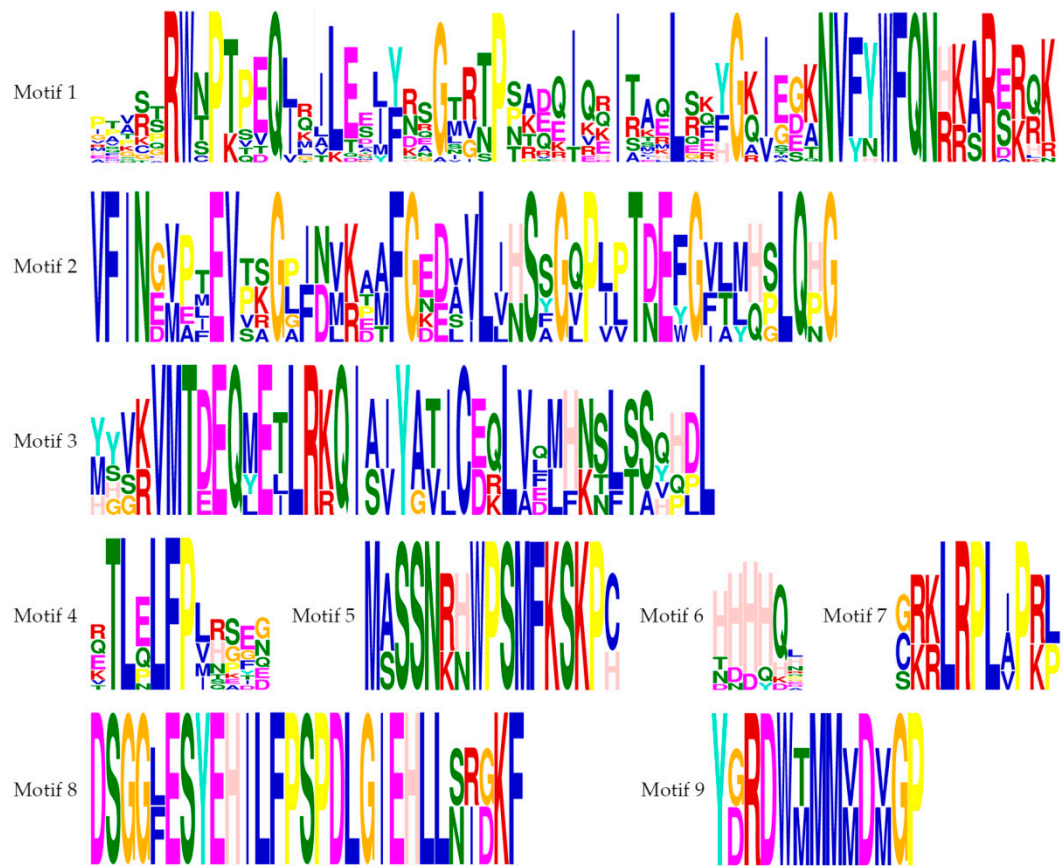

**Figure S12.** The conserved amino acid sequences of WOX protein in *A. thaliana* and *B. papyrifera*.

**Table S1.** The degenerate primer sequences of *BpWOXs* used to get fragments from paper mulberry.

| Gene Name      | Forward primer (5'-3')                 | Reverse primer (5'-3')               |
|----------------|----------------------------------------|--------------------------------------|
| <i>BpWUS</i>   | TGCMGGCAAAGCAGYACAAGRTGG<br>ACDCC      | TGAACCTTTTCTTYGCCTCTCNCGAGC<br>YTT   |
| <i>BpWOX1</i>  | TCAAGATGGAACCCNACDGAGCAG<br>YTGAGG     | GYTTCTGCCTYTCTCTGGCCTTRTGRTTT<br>TG  |
| <i>BpWOX2</i>  | AATATTGCACAAGTAGTGCCATTAC<br>AAAGCAC   | CGCTGCTTCTTTTGTCCCTTGCTTTGTG<br>GTT  |
| <i>BpWOX3</i>  | GATGGTGCCCAACVCCCGAGCARCT<br>GATGMTCT  | TTCTGYCTRICYCTDGCCTTGTGRTTYTG        |
| <i>BpWOX4</i>  | GTGAGACGCACCCRGGAGGGACR<br>MGNTGGAA    | GGCTGAGGCCRAGGCTGYTGCGYTTYTG<br>CTT  |
| <i>BpWOX5</i>  | GGAACVAAGTGYGGDCGTTGGAATC<br>CNAC      | GARACYTTGCGGCGCTTCTGYCTYTCYC<br>TG   |
| <i>BpWOX7</i>  | GAACCGNGCCGTNAGGTCAAGDTG<br>GAYWCCAAAG | GCCTGCADCTGCCTBTGDCGGCGDCGR<br>GABC  |
| <i>BpWOX8</i>  | ATGGCTTCWTCAAACAGACACTGG<br>CCDAGCAT   | GCTTGTGYTTGCTTCTBGATTNCKGTTY<br>TG   |
| <i>BpWOX9</i>  | TGGGAAATCTRTACTGCGAYACGYT<br>GATGACATC | GGATCMAAGAAATGCAGRTCAGARCTY<br>ATCTC |
| <i>BpWOX10</i> | CTGGAMTGARRCTDGGDARTBTTCA<br>CTATGAT   | GATTGCTTTCTYTTYGAACGAGCTCTYCT<br>GTT |

**Table S2.** The sequences of PCR products amplified with the degenerate primers in paper mulberry. The fragment sequences are used to design the RACE-PCR primers. The red backgrounds are the 3'-RACE primers, and the green backgrounds are the 5'-RACE primers.

| Gene Name     | Sequence (5'-3')                                                                                                                                                                                                                                                                                                                                                                      |
|---------------|---------------------------------------------------------------------------------------------------------------------------------------------------------------------------------------------------------------------------------------------------------------------------------------------------------------------------------------------------------------------------------------|
| <i>BpWUS</i>  | TGCAGGCAAAGCAGCACAAAGATGGACACCAACAAGTGACCAGATAAGGATTCTCAA<br>GGACCTTTACTACAACAATGGCGTGAGGTCCCGAAGTGCAGAGCAGATTCAGAGGAT<br>CTCTGCCCCGCTGAGGCAGTACGGCAAGATTGAAGGCAAGAATGTCTTTATTGGTTT<br>CAGAACCATAAAGCTCGCGAGAGGCAAAACAAAAGGTTCA                                                                                                                                                       |
| <i>BpWOX1</i> | GGTGAACCCGACGCCGAGCAGCTGAGGGCCCTCGAAGAGCTCTACCGCCGCGGG<br>ACCCGAACGCCATCGGCCGAGCAAATTCAGCACATCACGGCTCAGCTTCGGAGATAT<br>GGAAAGATTGAAGGGAAGAACGTGTTCTATTGGTTCCAAAATCACAAGGCCAGAGA<br>GAGGCAGAAGC                                                                                                                                                                                        |
| <i>BpWOX2</i> | AATATTGCACAAGTGGTGCCATTTCAAAGCACGCGGTGGAGTCCGACGCCGGAGCAG<br>TTGATGGCGCTGCAAGAGCTGTACCAGCGTGGACGCGGACCCCAACGGCGCAGCA<br>GATCCAGGAAATCACCGCGAAGCTCCGGCGGTTTCGGGAAGATTGAAGGCAAAAACG<br>TGTTCTACTGGTTTCAGAACCACAAAGCCAGGGACAAAAAGAAGCAGCG                                                                                                                                                |
| <i>BpWOX3</i> | TCAAGATGGTGCCCAACACCCGAGCAGCTGATGATCCTGGAAGAGATGTACAGGGCT<br>GGAACAAGAATCCCAACGCGTCTCAAATCCAACAGATCACAGCCCATCTCTCGTTT<br>TACGGAAAGATTGAAGGC AAGAATGTGTTCTACTGGTTTCAGAACCACAAGGCCAGG<br>GACAGGCAGAAGC                                                                                                                                                                                  |
| <i>BpWOX4</i> | GTTGAGACGCACCCGGGAGGGACGCGGTGGAATCCGACGCAAGAACAGATAGGGAT<br>ACTGGAGACGCTGTACAGAGGAGGAATGCGCACTCCGAACGCGCAACAAATAGAGC<br>AAATCACGGCTCAGCTGGGCAAGTTCGGCAAGATCGAAGGCAAGAACGTGTTCTACT<br>GGTTCAGAACCAAGGCCCGGAGCGGCAGAAAGCAGAAAGCGCAACAGCCTCGG<br>CCTCAGCC                                                                                                                                |
| <i>BpWOX5</i> | GGAACAAAGTGCGGCCGTTGGAATCCCACGAGCGAGCAGGTTAAAGTCTGACCGA<br>TCTCTTCCGGTCCGGTCTCCGAACCCGAGCACCGACCAGATCCAGAAGATCTCCGC<br>TCAGCTCAGCTTTTACGGCAAGATCGAGAGCAAGAACGTCTTCTACTGGTTTCAGAA<br>CCACAAGGCCAGAGAGAGACAGAAGCGCCGCAAGGTCTC                                                                                                                                                           |
| <i>BpWOX7</i> | GAACCCGCCGTGAGGTCAAGGTGGAATCCAAAGCCAGAACAAATTCATCCTTGA<br>GTCCATCTTCAATAGTGGAATGGTAAACCCCTCCCAAGGACGAGACCGTGAGGATACG<br>GAAGCTACTCGAGAAATTCGGGGCCGTTGGCGACGCCAACGTATTCTACTGGTTCCA<br>AAACCGCCGCTCGAGGTCCCGCCGTCGCCAGAGGCAGATGCAGGC                                                                                                                                                    |
| <i>BpWOX8</i> | ATGGCTTCATCAAACAGACACTGGCCAGCATGTTCAAGTCCAAGCCTTGCAACACC<br>CACCCCCACCAATGGCAACACGACATCAACCAGTCTCTCATCTCAACTGGCTGCCAC<br>AGAATCCCTACACTTCAGTTGGCGGGTGCGAGGAGCGGAGCCCGGAGCCGAAGCC<br>GAGATGGAATCCGAAGCCGGAGCA GATTCGGATCCTGGAAGCGATCTCAACTCGGG<br>GATGGTAAACCCGCCGAGAGACGAGATAAGAAAGATCAGGGCACAATTGCAGGAGT<br>ACGGCCAAGTGGGTGACGCCAACGTGTTTACTGGTTCCAGAACAGGAAATCCAGA<br>AGCAAACACAAGC |
| <i>BpWOX9</i> | TGGGAAATCTATACTGCGACACGTTGATGACATCTGCGGGCCACAAGATCACGGCGA<br>GACAGCGTTGGACTCCGACTCTGTGCGAGCTACAGATTCTGGAGAGCATGTTTGACC<br>AGGGGAATGGAATCCAAGCAAGCAAAAAGATCAAAGAGATAACCTCTGAAGTGAAGC                                                                                                                                                                                                   |



|                |                                                                                                                                                                                                                                                                                  |
|----------------|----------------------------------------------------------------------------------------------------------------------------------------------------------------------------------------------------------------------------------------------------------------------------------|
|                | CAGCATGGCCAGATTTGGGAGACTAATGTCTACAATTGGTTCCAGAACAGGCGTGCT<br>CGGTCGAAAAGGAAACAGCAGAATAATGCAGCACCCAACAATACTGAATCTGAAGT<br>GGAGACTGAAGTTGAGTCACCTAAGGACAAGAAGACAAAGCCGGAGGAGTTTCTGT<br>CCCAACAGAACTCGGCTTCGAGGGCTGAAGATATCTGCTTCCAGAGCTCCGAGATCA<br>GCTCTGACCTGCATTTCTTGATCC       |
| <i>BpWOX10</i> | CTGGAATGAAGCTGGGAAGTCTTCACTATGATCCACTAATGACATATGGTGGCCACAA<br>GATCACTGCAAGGCAAGGTGGTCACCAACGCCTGTGCAGCTTCAAACCTAGAGA<br>AAATTTTCGATGAAGGGAATGGGACTCCGAGCAAGCAGAAGATCAAAGAGATAACC<br>GTAGAGCTGAGTCAACATGGCCAAATTCGGAAACCAATGTCTACAATTGGTTCCAG<br>AACAGGAGAGCTCGTTTCAAGAGAAAGCAATC |

**Table S3.** The primer sequences of *BpWOXs* used for full-length cDNA amplifications.

| Gene Name      | Forward primer (5'-3')                 | Reverse primer (5'-3')                |
|----------------|----------------------------------------|---------------------------------------|
| <i>BpWUS</i>   | ACATGGGGACCATCCACATAACAT<br>TTT        | GTGTCAAGACCATCGTCATATATAATAATC<br>A   |
| <i>BpWOX1</i>  | GATAATAGTACTACACTACAATGCCT<br>ACCTCC   | CCATTTTAAGGCAAACCTCCTTTTCA            |
| <i>BpWOX2</i>  | ATGTCCATTTGAAGCCTAGATATCAA<br>ACTA     | AAATCTTCTATATTTTACTCACGTCCTTTAT<br>TC |
| <i>BpWOX3</i>  | ACCCCAAGAGACAAAGACAAAAGT<br>CGAATC     | AGTCTTTTGAAGGTAAACAAGGCATTTT          |
| <i>BpWOX4</i>  | CCTCACCTCATCATTTGGTCTTGGTT<br>ATC      | TGATCTGCTGCTTATTGGAACCAAAGAGC<br>G    |
| <i>BpWOX5</i>  | ATACATGCACACGGGTTTCACATTG              | TCATAAACATAAACTACCGATGTCCTACC<br>GTAG |
| <i>BpWOX7</i>  | CAATGGAAGATCATCACCATCATCA<br>AGGC      | GTAAAGACGTAATATTTATGGGAGACTG<br>GC    |
| <i>BpWOX8</i>  | ATCTCATCAGTACCAAAAACAAGAG<br>CAAC      | CCACGAAAAGCATTCATTTTTACTACAC          |
| <i>BpWOX9</i>  | GTTTGTCTCTTTCTTTCCAACCTTTTT<br>C       | GGTTCATCCATTCATATCCAATCATAAAAT<br>G   |
| <i>BpWOX10</i> | AGTGTCACTACTAAACACTTGCTTG<br>CAATCTAAG | GGTTTTTCAATAGACCCAGTTCATCATAAT<br>CTG |





|               |                                                                                                                                                                                                                                                                                                                                                                                                                                                                                                                                                                                                                                                                                                                                                                                                                                                                                                                                                                                                                                                                                                                                                                                                           |
|---------------|-----------------------------------------------------------------------------------------------------------------------------------------------------------------------------------------------------------------------------------------------------------------------------------------------------------------------------------------------------------------------------------------------------------------------------------------------------------------------------------------------------------------------------------------------------------------------------------------------------------------------------------------------------------------------------------------------------------------------------------------------------------------------------------------------------------------------------------------------------------------------------------------------------------------------------------------------------------------------------------------------------------------------------------------------------------------------------------------------------------------------------------------------------------------------------------------------------------|
|               | CTACTAATCTCAAAGAAGAGTGTACGACGTCAAAAACATGTCCCTCATTCCACCCCAACGATGA<br>CCATCTAATGACCAGTCTAAATTCCTATCTGCATGGCTCTCTTTCTCTCTCTCTCTCTCTCTCT<br>CTCTCTCTCTCTAAGTCTATGTCTAGATGCTACAAGGGTAGGCTTGAAAGTGTCTGTGTGTTGTT<br>TATTTTCTTGGTTTCTGTTATTTGTCTAGAGCTCTAGGAAGAGAAAGATCGCAATTGTCTAGCGA<br>GTAATACGTTACTGGCTCTATTGTCTTACTACTACCTACTCAATGAAATGCCTTGTTTACCTTC<br>AAAAGACT                                                                                                                                                                                                                                                                                                                                                                                                                                                                                                                                                                                                                                                                                                                                                                                                                                            |
| <i>BpWOX4</i> | CCTCACCTCATCATTTGGTCTTGGTTATCCCAAGCACACCTCATTTCCCACTTTGGTGACTTTA<br>ATCGTACCAGTACATTACTTTGCTATATAACCAGGGGTTTGTGTAGTGATTAGTCTCTCCACCAT<br>GGGAAGAAGTAGCTGCAGCATGAAGGTGCATCAGTTCGCACGTGGACTCTGGGAGGCTCACG<br>AACCTCCCTCACGCTTGGCTGCAAACGCTTACGCCCTCTTGCTCCCAAGCTCCCTAACTCTCC<br>TCCTTCTACTACCGACACTACTCACATTACTACCCTGCTTCTTCCCCCACTCCATCGCTCCTT<br>TCGATCTCAAGAGCTTCATCAGACCCGAAAGCGGGCCCCGAAAGCTCGGTTCTCCGACGAC<br>AAGAAAGACTCGCTCCGTTGAGACGCACCCGGGAGGGACGCGGTGGAATCCGACGCAAG<br>AACAGATAGGGATACTGGAGACGCTGTACAGAGGAGGAATGCGCACTCCGAACGCGCAACA<br>AATAGAGCAAATCACGGCTCAGCTGGGCAAGTTCGGCAAGATCGAAGGCAAGAACGTGTTCT<br>ACTGGTTCCAGAACCACAAGGCCCGGAGCGGCAGAAAGCAGAAGCGCAACAGCCTCGGCCT<br>CAGCCACAGCCCGGAACCCCGACCCCAATCGCCATAGCCACCTGCGGTTTGGACACTAGGG<br>GAGACTTGGACAGAGACCCGGAAGATAGTACTAGTCCGTACAAGAGGAAGTGCCGGAGCTG<br>GGGATTTGAATGCTTGGTAGAAGAGCATAGTAGTAGAATATTGTATAACAATTATAGAGATCAG<br>GATCAGGGAGATAGGACTCTGGAGCTTTCCATTACACCCGGAAGGCATGAGATGATGGGG<br>GGTTTTGGGGAGAGAGAAAATACTAGTAATAATTCATCCTTCTTTCACCATCATATCATTTTTCA<br>GCTTTAGTTTATGTGGCCGGTATATGAATATTATCAGCTTAATATGTGCTTTTCTTTCCTTTTCTT<br>CTTTTTTCTTTCGCTTCGGGAAAAGAAGAAAAAAGAAGGTACTTGTCTGATCTCTTTTGTAGT<br>ACTGATCTGCTGCTTATTGGAACCAAAGAGCG |
| <i>BpWOX5</i> | GCACACGGGTTTCACATTGAAAACCTGATCAGAAAACCTGCTATATCACTAGGAACTTCAGTGAC<br>AGAGATCAGAAGATTTTGGAGCTCAAAAAATGGAAGATCATGGCATGTCAGGCTTTTGCAATTA<br>AAGCGGGACATAACATGGCTAACAAACGTTGTCGTTTCGCGGTACTACTGGAACCAACGGCAGC<br>ACTGGAACAAAGTGCGGCCGTTGGAATCCCACGAGCGAGCAGGTTAAAGTCCTGACCGATCT<br>CTTCCGGTCCGGTCTCCGAACCCGAGCACCGACCAGATCCAGAAGATCTCCGCTCAGCTCA<br>GCTTTTACGGCAAGATCGAGAGCAAGAACGTCTTCTACTGGTTTCAGAACCACAAGGCCAGA<br>GAGAGACAGAAGCGCCGCAAGGTCTCCGTTGATGATCATGACAAGGATTTCTGTTCTAAGAGA<br>GGACAAGATTCCCTCTCCCAAACGTAATTTTGGGAGATATATCACAGTCGCCATCATCATCAT<br>CATCATCATCATCATGATCACGAGGAATATCAGGTTTCTGAGCCGGAAGAGTGATTGAGACG<br>CTCCAACCTCTTCCGTTGAATTCGTTTCGGAGAGCCGGATTTCGGAGAAGCTGAGATTCATGAT<br>CAGTGCAGAGAAACAGCGGCTTTTCCGTACACAATTGAGTCAGCAATAGAACATCCTCCAGT<br>ACTGGATCTGCGCTTAAGCTTTGTCTAATTAAGCATGTTTAGTTTACATCTTAGCCAAAAAAA<br>AAGAAAGAAAGAAAAAGAGAGAGATAGTTTTTGTATCACGTATTAATTAGG                                                                                                                                                                                                                                                                                                                    |
| <i>BpWOX7</i> | CAATGGAAGATCATCACCATCATCAAGGCCAAGACGCTAACAGTCCAAGCAACGGCTCCGAG<br>AAAAGTAGTAGTGCTAGTACCGAACCCGCCGTGAGGTCAAGGTGGACTCCAAGCCAGAAC<br>AAATTCTCATCCTTGAGTCCATCTTCAATAGTGAATGGTAAACCCTCCCAAGGACGAGACCG<br>TGAGGATACGGAAGCTACTCGAGAAATTCCGGGGCCGTGGCGACGCCAACGTATTCTACTGGT<br>TCCAAAACCGCCGCTCGAGGTCCCGCCGTCGCCAGAGGCAGATGCAGGCCAGCCTCGAAGT<br>CCAGCAGCGGAACCAGGCCGACAAGGTGTTGGTGGTGCATTCAGTATGAAAGCAATAATT<br>ATAACAGCAATAGTACTACTCAGGCCATGGCCGGTTATGTAGCTGGTTCGGCTCTTTTGTGTTG                                                                                                                                                                                                                                                                                                                                                                                                                                                                                                                                                                                                                                                                                                                                  |

|               |                                                                                                                                                                                                                                                                                                                                                                                                                                                                                                                                                                                                                                                                                                                                                                                                                                                                                                                                                                                                                                                                                                                                                                                                                                                                                                                                                                                                                                                                                                                                                                                                                                                                                                                                                                                               |
|---------------|-----------------------------------------------------------------------------------------------------------------------------------------------------------------------------------------------------------------------------------------------------------------------------------------------------------------------------------------------------------------------------------------------------------------------------------------------------------------------------------------------------------------------------------------------------------------------------------------------------------------------------------------------------------------------------------------------------------------------------------------------------------------------------------------------------------------------------------------------------------------------------------------------------------------------------------------------------------------------------------------------------------------------------------------------------------------------------------------------------------------------------------------------------------------------------------------------------------------------------------------------------------------------------------------------------------------------------------------------------------------------------------------------------------------------------------------------------------------------------------------------------------------------------------------------------------------------------------------------------------------------------------------------------------------------------------------------------------------------------------------------------------------------------------------------|
|               | CTCTCCTTCTTATAGTAATCTTGTGGGTTCTTCTTCTCTCTTCATCATCTTCATGCGGAGTTTGT<br>GCAGATCATCATGATCACCATCATGGTTTGGACTACAATACCAATTCTTTCAAGTCTCTGGTC<br>AAATGGGTTTTCCGCAAATTGAGCAAAGCTCTCCTGTAAACGTCTGTTTTGTATCCTCCAGATAG<br>CTCAAACATGCACCTCGAATCTGGATTCATCACAGTGTTTCATCAATGGGGTTCCAACAGAAGT<br>TCCTAAGGGCCTAATTGACTTGAAACCAATGTTTGAAAAAGATGTGATTTTGGTGCATTCTCC<br>GGAGTTCCACTTCCAATAATGAATTTGGCATTCTAATGCAGGGCTTGACGCTGGTGAAAGC<br>TATTTCTGGTGCCGAGAACACGTTAAGTAATAACTGAAGCAGCATCTAGCTAGATTGCTAC<br>CAATGGAAGCTTCCCTACATATTCCAATCTTGATTTCTTCATTCTTTTTTCTCTCCTTATACATT<br>TATTATAGATTTCTATTTTGTGGTTTTAAGGATTTAAATTGAGAGTGCTATTATATATATGTGTGTG<br>ATTATTAGAGACAATTAAGATCTATACATAAGAGTTGCCAATATCATGCATATGATTGCTTATTT<br>GTAATGCCAGTCTCCCATAAATATTACGTCTTTAAC                                                                                                                                                                                                                                                                                                                                                                                                                                                                                                                                                                                                                                                                                                                                                                                                                                                                                                                                                                                                                                                   |
| <i>BpWOX8</i> | ATCTCATCAGTACCAAAAAACAAGAGCAACAAAACGGCTACTTCATCTCATTGTTTCTCTTTTGT<br>TTATCTACTTTTAAATTACTTCTCAGATCATCAGTTTCATCATCATCATCATCATGCGTTTCATCAAA<br>CAGACACTGGCCAGCATGTTCAAGTCCAAGCCTTGCAACACCCACCCCAACCAATGGCAAC<br>ACGACATCAACCAGTCTCTCATCTCAACTGGCTGCCACAGAACTCCCTACACTTCAGTTGGCG<br>GGTGCGAGGAGCGGAGCCCGGAGCCGAAGCCGAGATGGAATCCGAAGCCGGAGCAGATTCC<br>GATCCTGGAAGCGATCTTCAACTCGGGGATGGTAAACCCGCCGAGAGACGAGATAAGAAAG<br>ATCAGGGCACAATTGCAGGAGTACGGCCAAGTGGGTGACGCCAACGTGTTTTACTGGTTCCA<br>GAACAGGAAATCCAGAAGCAAAACAAAGCTCCGACACCTCCAAAACCTCAAACAACAACA<br>ACAACAGCAAACTCAGAACAATCACCAAACTCTCCGAACCTCAAATTTACCACCACTACAA<br>CCACTAGTAGTACTACTCTCTACCACCAGCACAAAGAGCTCCTTCTCATCGTCTCTGCTCTC<br>CTCGGAGAAATCGTCTCCGAAAGCCCCGAACAGATCGCCGATCTTCTCGATGGGCTTCACCG<br>AAGCCCTAAACTCTCCGACCGGCTCGGTCAACCAGAGCACCTTCTTTCAGACCAACGGTAGT<br>ACCATCACTAGTACTGGTCACGACCCGTTCTTGCCGAACCTTTTTCTTCCGGTGCAACAGT<br>CCAGTACTAGTACTACTCAAGGGTTTTGCTTCCCTCATGATCAGCTCACGCCGACTGCGGTCCA<br>TCAGATTATGCCCCGAGATCATTATCAACAGATTAACAACATCGGACCGTGCACTAGCCTCTTG<br>CTCAGCGAGATCATGAACCATCATGGGGCTTCAACGAAAGGCCATGATCATGATCATCATAAG<br>CTGCTACCGCTTAATTACACTCCGTGAGGCGCGCGGACGACGGTGCCAAGGACTACTTCT<br>CCGGCCAGTACTCTCTCACTACGGCTGCTACTAGTACTATTGAATCTTCAACATCACAAAGGA<br>ATCAAATCCAAGCAGGTGTTGGAGAACAGGGAACCTTCTGGAGTGGGGCCAATCGGAGGGGG<br>CGGTAAACGACGGTGTTATAAACGACGTGGCGTTTGAGGTGCCGGCGGGGCCGTTCAATG<br>TGAGGGAGGCGTTTGGGGAGGAGGCTGTGCTCATCCACTCCTACGGTCAGCCAGTTCTCACC<br>AACGAGTGGGGGGTCACTCTTCACTCCCTCCAGCCTGGTGCTTTTATTATCTAATTTAGGAGC<br>TTGGGAGATATATCTAGCTAGATATGAGAAAAACACACGCTGGCTGTGGTTCAATTAATCACT<br>ACATATATTTCTGCTCTTATCTCTTAAAGTTTGGATTAGGGCTTTCAATGACTTGTATATTAGCTC<br>TGTTAATTAGTCCGTTTAGTGACAACTTGAAAATTTGGTGACTCATATTATATATATGATTCTC<br>TTTCAGTTGTTAAGTAGAGAATTATATCAAAGATGTGTAGTAAAAATGAATGCTTTTCGTGG |
| <i>BpWOX9</i> | GTTTGTCTCTTTCTTCCAACCTTTTTCTGTCTCTCTCCTCTCTCCGACTAAAGACTGGTTTT<br>TTAGACAAACATACTCCTCCGTTTCCAGACTGTGAGCCTGAGAAAGAGGAGAGAGAAAGA<br>AGAGAGAGAGAGAGAGAGAGAGAGAGAGAGAGAGAGAGAGAGAGGAGGATGATGGGGTGGGAGAAGCAGG<br>AGGAGAGAGAAGGGCATAATAATAGTAACAGCAGTAATCTGTATCATCACCATGTGAAGGTG<br>ATGACTGACGAGCAATTGGAGACGCTTCGCAAGCAAATCTCCATCTACGCCACCATTGCGAG<br>CAGCTCGTTCAGATGCACAAGAACCTCACTTCCCATCACGATCTCCCTGGCGTCCGATTGGGA<br>AATCTATACTGCGACACGTTGATGACATCTGCGGGCCACAAGATCACGGCGAGACAGCGTTG                                                                                                                                                                                                                                                                                                                                                                                                                                                                                                                                                                                                                                                                                                                                                                                                                                                                                                                                                                                                                                                                                                                                                                                                                                                                                                             |



|                |                                                                                                                                                                                                                                                                                                                                                                                                                                                                                                                                                                                                                                                                                                                                                                                                                                                                                                                                                                                                                                                                                                                                                                                                                                                                                                                                                                                                                                |
|----------------|--------------------------------------------------------------------------------------------------------------------------------------------------------------------------------------------------------------------------------------------------------------------------------------------------------------------------------------------------------------------------------------------------------------------------------------------------------------------------------------------------------------------------------------------------------------------------------------------------------------------------------------------------------------------------------------------------------------------------------------------------------------------------------------------------------------------------------------------------------------------------------------------------------------------------------------------------------------------------------------------------------------------------------------------------------------------------------------------------------------------------------------------------------------------------------------------------------------------------------------------------------------------------------------------------------------------------------------------------------------------------------------------------------------------------------|
|                | <p> GACTCCGACTCCTGTGCAGCTACAGATTCTGGAGAGCATGTTTGACCAGGGGAATGGAATC<br/> CAAGCAAGCAAAAGATCAAAGAGATAACCTCTGAACTGAGCCAGCATGGCCAGATTTCTGGA<br/> GACTAATGTCTACAATTGGTTCCAGAACAGGCGTGCTCGGTGCAAAAGGAAACAGCAGAATA<br/> ATGCAGCACCCAACAATACTGAATCTGAAGTGAGACTGAAGTTGAGTCACCTAAGGACAAG<br/> AAGACAAAGCCGGAGGAGTTTCTGTCCCAACAGAACTCGGCTTCGAGGGCTGAAGATATCTG<br/> CTTCCAGAGCTCCGAGATCAGCTCTGACCTGCATTTCTTTGATCCGCATTCCAACAAAGGAGA<br/> AGCCATGTTCTCATCAAACAATTCTTTACGGCCTGCGAGGAATTTGACTCAAATGCCATTCTAC<br/> GACGGTCTGCTCTCGAACTCAAGAAATGAGCATCTGAGTGGAATAATGGAAGTGCCAGGGA<br/> GTTATGGTCTTTACGAGCATGCGGAAAACCTACAGCATGACGGGATGAGGCTATCGTCCGAGGG<br/> AGAAGTTAATATTGTGAATAGAAAGAGTACAGATTCCAGATGCAGCTTGGTGATGTGTTATTA<br/> GCAATCATTGCAATTGGGTGCCGTACAAACAGTCTTGGATATGGAATGTACCTGAACCCACC<br/> TACTTAGTAAAGAGTACAAAGCTAACTTAGCAGAGTTTAATGTTTCTCTTTTTGTCTTCATTTT<br/> ATCTGGTCCAGTTTATCAGGGAGTAGAATGTCATGGTTTTGATTGGTGAACAAACAACTTGA<br/> GTCTCTTTAAGTTCCTGTTAACTTTTGATAAATGTGAGGACTTTTTGCCCTTTTTGTGTTTTGGC<br/> TGATAGTTGATCCGTGAGTTCCTTTTGCTTTTGTCATACAATGAACCCATTTATGATTGGATAT<br/> GAATGGATGAACC </p>                                                                                                                                                                                                                                                                                                                                   |
| <i>BpWOX10</i> | <p> AGTGTCAGTACTAAACACTTGCTTGCAATCTAAGGCTGACTCTCTCTCTTTGTTTCTCTTTCTCT<br/> GTCTAAGTCAGATTCTCTGACAGAGGTTGAAGATCCAGGGCTTTTGGACAAATGGTTAACTA<br/> ACTCTGGACTGCTCTACTTTTGTGTTGTGTCAGAAACAGGAGTGAGAAAGAGAGCAATTATAG<br/> TTAAGGAAGATGATGGAGTGGAAGATTCAACAACAACAAGATCATCATGATCATGATCA<br/> TGATAAACATGATCATCAGATGGAGATGGGAATATTGCAGAAAAAGGAAGATCAAGAGAATT<br/> CAACTATTGTTGGGGTTGTTCTCTCTCCAAATCCAAAAGATGGGTAGGGTTAATGTACGTGAA<br/> GGTTATGACTGACGAGCAAATGGAGCTTCTCAGGCGCCAGATCTCCGTCTACGCCACCATCTG<br/> CGAGAAGCTTGCTGACATGTTCAACTCCTTCTCTTCCCAACATGATCTCGCTGGAATGAAGCT<br/> GGGAAGCTTCACTATGATCCACTAATGACATATGGTGGCCACAAGATCACTGCAAGGCAAA<br/> GGTGGTCACCAACGCCTGTGCAGCTTCAAACCTAGAGAAAAATTTTCGATGAAGGGAATGGG<br/> ACTCCGAGCAAGCAGAAGATCAAAGAGATAACCGTAGAGCTGAGTCAACATGGCCAAATTTCT<br/> GGAAACCAATGTCTACAATTGGTTCCAGAACAGGAGAGCTCGTTCCAAGAGAAAGCAATCCG<br/> TTCCAGCTCCAACTGCGTGGAAGTAGAAGTAGAGACCGAACTCAAGAGCATTTGAAGGAC<br/> AGTGCAAAACCAGAAGATACTGAATTCTGTGACAACCTCGGCTGCAGGGGAGGATCATGTGTA<br/> TTTTCCAAGTCCTGAGGAGTTGATCAACTGGTCCGCGAATGGAAGTGCCATTGAGCTGCATGC<br/> CTTGCCCTTCATGGGGAGGATTTGATGTGGATGAGCTCTAGTTGGGATTCTTATATGGTCTCTGTTG<br/> TTGCTCTTCAGCTGATCTTATTATAAATTTCTGTTCAATGGATTAGAATTTTACATTAGAGAGAA<br/> CTTCATTATTAAAATATTATAGTCATAGGTAATTTAGCAATCACTGACAATCTGACATGTGGACT<br/> TATAAAATCGTATGTGTCAGACTTGGCTAAAAAACTAACTGATAGCGAATGTCTTTGATGTTA<br/> GCATGTATATGTAATCTTTACAATCAGATTATGATGAACTGGGTCTATTGAAAAACC </p> |

**Table S5.** The species information used to reconstruct the phylogenetic tree. Letter A represents the ancient clade, I represents the intermediate clade, and W represents the WUS clade.

| Species                            | The numbers of<br>WOX gene | A  | I  | W  |
|------------------------------------|----------------------------|----|----|----|
| <i>Ostreococcus lucimarinus</i>    | 1                          | 1  | 0  | 0  |
| <i>Physcomitrella patens</i>       | 3                          | 3  | 0  | 0  |
| <i>Selaginella moellendorffii</i>  | 8                          | 7  | 1  | 0  |
| <i>Picea abies</i>                 | 18                         | 4  | 8  | 6  |
| <i>Amborella trichopoda</i>        | 9                          | 1  | 2  | 6  |
| <i>Oryza sativa. ssp. Japonica</i> | 14                         | 1  | 6  | 7  |
| <i>Brachypodium distachyon</i>     | 13                         | 2  | 5  | 6  |
| <i>Populus trichocarpa</i>         | 18                         | 3  | 4  | 11 |
| <i>Medicago truncatula</i>         | 19                         | 3  | 7  | 9  |
| <i>Morus notabilis</i>             | 11                         | 2  | 2  | 7  |
| <i>Broussonetia papyrifera</i>     | 10                         | 2  | 2  | 6  |
| <i>Prunus persica</i>              | 10                         | 2  | 2  | 6  |
| <i>Cucumis melo</i>                | 10                         | 2  | 2  | 6  |
| <i>Vitis vinifera</i>              | 11                         | 3  | 2  | 6  |
| <i>Gossypium raimondii</i>         | 20                         | 4  | 4  | 12 |
| <i>Arabidopsis thaliana</i>        | 15                         | 3  | 4  | 8  |
| <i>Solanum lycopersicum</i>        | 10                         | 1  | 2  | 7  |
| <i>Theobroma cacao</i>             | 11                         | 2  | 2  | 7  |
| <i>Utricularia gibba</i>           | 17                         | 1  | 4  | 12 |
| Total number                       | 228                        | 47 | 59 | 59 |

**Table S8.** The primer sequences of *BpWOXs* used in qRT-PCR.

| Gene Name      | Forward primer (5'-3')        | Reverse primer (5'-3')      |
|----------------|-------------------------------|-----------------------------|
| <i>BpWUS</i>   | TGAGCTAACCTCAACTCCTACG        | TCACACAATCATCATAAATAGAGCATG |
| <i>BpWOX1</i>  | GCCGGCCTACAGATCAGAAAATG       | CTTCAATGGTAGGAACTCAAAGAACTG |
| <i>BpWOX2</i>  | ACTGCTACAACTCTTGAGCTATTTCC    | ACTCACGTCCTTTATTCTTACTTTGC  |
| <i>BpWOX3</i>  | GAAGGAGAACTCCATGATGAGAATG     | GAGAGCCATGCAGATAGGAATTTAG   |
| <i>BpWOX4</i>  | CTAGTCCGTACAAGAGGAAGTGCC      | CATATACCGGCCACATAAACTAAAG   |
| <i>BpWOX5</i>  | GCATTAAAGCGGGACATAACATG       | GTCCTCTCTTAGAACGAAATCCTTGT  |
| <i>BpWOX7</i>  | CGTTAAGTAATAACTGAAGCAGCATCT   | ATGGGAGACTGGCATTACAAATAAG   |
| <i>BpWOX8</i>  | GACGACGGTGGCAAGGACTAC         | AGGCTGGAGGGAGTGAAGAGTG      |
| <i>BpWOX9</i>  | ATGCGGAAAACTACAGCATGAC        | CAAAACCATGACATTCTACTCCCTG   |
| <i>BpWOX10</i> | CTAGAAAGTAGAGACCGAAACTCAAGAGC | CTGAAGAGCAACAACAGGACCAT     |
| <i>BpGAPDH</i> | TCAACATCATTCCTAGCAGTACCG      | AGTCAGTGGAACCACGTCATC       |

**Table S9.** The restriction enzymes and primers used to construct the recombinant expression vectors for subcellular localization (SL) and transactivation activity assay (TA).

| Gene Name          |               | Forward primer (5'-3') |               | Reverse primer (5'-3')  |
|--------------------|---------------|------------------------|---------------|-------------------------|
| <i>BpWUS</i> -SL   | <i>Xba</i> I  | GCTCTAGAATGGAACCTCAAC  | <i>Sal</i> II | ACGCGTCGACAAGCGAATCCGG  |
|                    |               | AACAAAACCAATC          |               | TGACCCGCTAG             |
| <i>BpWOX1</i> -SL  | <i>Xba</i> I  | GCTCTAGAATGTGGATGATGG  | <i>Sal</i> II | ACGCGTCGACATTCTCAATGGT  |
|                    |               | GCTATAACGACG           |               | AGGAACTC                |
| <i>BpWOX2</i> -SL  | <i>Xba</i> I  | GCTCTAGAATGTGGACGATGG  | <i>Pst</i> I  | AACTGCAGGAGGAAGAAACGCA  |
|                    |               | GTCGTAGTACTA           |               | ACGAGAGG                |
| <i>BpWOX3</i> -SL  | <i>Xba</i> I  | GCTCTAGAATGTCTCCAGCAG  | <i>Sal</i> II | ACGCGTCGACGATGGTCATCGTT |
|                    |               | CCAATTCATCAAG          |               | GGGGTGGAAATG            |
| <i>BpWOX4</i> -SL  | <i>Xba</i> I  | GCTCTAGAATGGGAAGAAGTA  | <i>Sal</i> II | ACGCGTCGACTCTCATGCCTTCC |
|                    |               | GCTGCAGCATGA           |               | GGGTGTAA                |
| <i>BpWOX5</i> -SL  | <i>Xba</i> I  | GCTCTAGAATGGAAGATCATG  | <i>Sal</i> II | ACGCGTCGACGACAAAGCTTAA  |
|                    |               | GCATGTCAGGCT           |               | GCGCAGAT                |
| <i>BpWOX7</i> -SL  | <i>Xba</i> I  | GCTCTAGAATGGAAGATCATC  | <i>Sal</i> II | ACGCGTCGACGTTATTACTTAAC |
|                    |               | ACCATCATCAAGG          |               | GTGTCT                  |
| <i>BpWOX8</i> -SL  | <i>Xba</i> I  | GCTCTAGAATGGCTTCATCA   | <i>Sal</i> II | ACGCGTCGACAAATTAGATAATA |
|                    |               | ACAGACACTGGC           |               | AAAAGCACCAGG            |
| <i>BpWOX9</i> -SL  | <i>Xba</i> I  | GCTCTAGAATGATGGGGTGGG  | <i>Sal</i> II | ACGCGTCGACTCCCGTCATGCTG |
|                    |               | AGAAGCAGGAG            |               | TAGTTTTTC               |
| <i>BpWOX10</i> -SL | <i>Sma</i> I  | TCCCCCGGGATGATGGAGTGG  | <i>Sal</i> II | ACGCGTCGACGAGCTCATCCACA |
|                    |               | AAGATTCAACAAC          |               | TCAAATCCTC              |
| <i>BpWUS</i> -TA   | <i>Sma</i> I  | TCCCCCGGGGATGGAACCTCA  | <i>Sal</i> II | ACGCGTCGACGGTTAAAGCGAAT |
|                    |               | ACAACAAAACCAATC        |               | CCGGTGACCCGCTAG         |
| <i>BpWOX1</i> -TA  | <i>Sma</i> I  | TCCCCCGGGGATGTGGATGAT  | <i>Sal</i> II | ACGCGTCGACGGTCAATTCTTCA |
|                    |               | GGGCTATAACGACG         |               | ATGGTAGGAACTC           |
| <i>BpWOX2</i> -TA  | <i>Sma</i> I  | TCCCCCGGGGATGTGGACGAT  | <i>Pst</i> I  | AACTGCAGCCTCAGAGGAAGAA  |
|                    |               | GGGTCGTAGTACTA         |               | ACGCAACGAGAGG           |
| <i>BpWOX3</i> -TA  | <i>Sma</i> I  | TCCCCCGGGGATGTCTCCAGC  | <i>Sal</i> II | ACGCGTCGACGGTTAGATGGTCA |
|                    |               | AGCCAATTCATCAAG        |               | TCGTTGGGGTGGAAATG       |
| <i>BpWOX4</i> -TA  | <i>Eco</i> RI | CCGGAATTCCGGATGGGAAGA  | <i>Sal</i> II | ACGCGTCGACGGTCATCTCATGC |
|                    |               | AGTAGCTGC              |               | CTTCCGGGTGTAA           |
| <i>BpWOX5</i> -TA  | <i>Sma</i> I  | TCCCCCGGGGATGGAAGATCA  | <i>Sal</i> II | ACGCGTCGACGGTTAGACAAAG  |
|                    |               | TGGCATGTC              |               | CTTAAGCGCAGAT           |
| <i>BpWOX7</i> -TA  | <i>Sma</i> I  | TCCCCCGGGGATGGAAGATCA  | <i>Sal</i> II | ACGCGTCGACGGTCAGTTATTAC |
|                    |               | TCACCATCATCAAGG        |               | TTAACGTTGTCT            |
| <i>BpWOX8</i> -TA  | <i>Sma</i> I  | TCCCCCGGGGATGGCTTCATC  | <i>Sal</i> II | ACGCGTCGACGGCTAAATTAGAT |
|                    |               | AAACAGACACTGGC         |               | AATAAAAGCACCAGG         |
| <i>BpWOX9</i> -TA  | <i>Sma</i> I  | TCCCCCGGGGATGATGGGGTG  | <i>Sal</i> II | ACGCGTCGACGGTCATCCGTC   |
|                    |               | GGAGAAGCAGGAG          |               | TGCTGTAGTTTTTC          |
| <i>BpWOX10</i> -TA | <i>Sma</i> I  | TCCCCCGGGGATGATGGAGTG  | <i>Sal</i> II | ACGCGTCGACGGCTAGAGCTCAT |
|                    |               | GAAGATTCAACAAC         |               | CCACATCAAATCCTC         |
